# Supplementary material for: Real-World Evidence of Clinical Outcomes of the Use of the Adalimumab Biosimilar SB5 in Rheumatic and Gastrointestinal Immune-Mediated Inflammatory Diseases: 12-Month Data from the PERFUSE Study
Source: PubMed Central journal article supplement — Drugs Real World Outcomes. 2024 Oct 10;11(4):573–91. doi: 10.1007/s40801-024-00459-6 (PMC11589083; doi:10.1007/s40801-024-00459-6), 2024-10-10
Supplement: 40801_2024_459_MOESM2_ESM.pdf [file 40801_2024_459_MOESM2_ESM.pdf]

**Title:**

Real-world evidence of clinical outcomes of the use of the adalimumab biosimilar SB5 in rheumatic and digestive IMIDs: 12-month data from the PERFUSE study

**Authors:**

- Bruno Fautrel,
- Yoram Bouhnik,
- Carine Salliot,
- Franck Carbonnel,
- Mathurin Fumery,
- Christophe Bernardeau,
- Yves Maugars,
- Mathurin Flamant
- Fabienne Coury,
- \* Ben Braithwaite,
- Janet Addison,
- On behalf of the PERFUSE investigators.

**\* Corresponding Author:**

Ben Braithwaite, Sanoïa e-Health Services, Gémenos, France, 0000-0002-7378-1034

*email address:* [bbraithwaite@sanoia.com](mailto:bbraithwaite@sanoia.com)

**Supplementary Table S2:** SNDS pairing statistics.



**Supplementary Table S2 – B: impact of SNDS data on persistence**

|                                            | <b>&lt; 12 months of exposure<br/>with SNDS data<br/>(N=441)</b> | <b>&gt; 12 months of exposure<br/>with SNDS data<br/>(N=470)</b> | <b>Total<br/>(N=911)</b> |
|--------------------------------------------|------------------------------------------------------------------|------------------------------------------------------------------|--------------------------|
| Exposure before consideration of SNDS data |                                                                  |                                                                  |                          |
| < 12 months of exposure without SNDS data  | 11 (100%)                                                        | 57 (25.6%)                                                       | 68 (29.1%)               |
| > 12 months of exposure without SNDS data  | 0 (0.0%)                                                         | 166 (74.4%)                                                      | 166 (70.9%)              |
| Missing data                               | 0                                                                | 0                                                                | 0                        |
