# Supplementary material for: Real-World Evidence of Clinical Outcomes of the Use of the Adalimumab Biosimilar SB5 in Rheumatic and Gastrointestinal Immune-Mediated Inflammatory Diseases: 12-Month Data from the PERFUSE Study
Source: PubMed Central journal article supplement — Drugs Real World Outcomes. 2024 Oct 10;11(4):573–91. doi: 10.1007/s40801-024-00459-6 (PMC11589083; doi:10.1007/s40801-024-00459-6), 2024-10-10
Supplement: 40801_2024_459_MOESM3_ESM.pdf [file 40801_2024_459_MOESM3_ESM.pdf]

**Title:**

Real-world evidence of clinical outcomes of the use of the adalimumab biosimilar SB5 in rheumatic and digestive IMIDs: 12-month data from the PERFUSE study

**Authors:**

- Bruno Fautrel,
- Yoram Bouhnik,
- Carine Salliot,
- Franck Carbonnel,
- Mathurin Fumery,
- Christophe Bernardeau,
- Yves Maugars,
- Mathurin Flamant
- Fabienne Coury,
- \* Ben Braithwaite,
- Janet Addison,
- On behalf of the PERFUSE investigators.

**\* Corresponding Author:**

Ben Braithwaite, Sanoia e-Health Services, Gémenos, France, 0000-0002-7378-1034

*email address:* [bbraithwaite@sanoia.com](mailto:bbraithwaite@sanoia.com)

**Supplementary Table S8:** STROBE cohort checklist.

STROBE Statement—Checklist of items that should be included in reports of *cohort studies*

|                           | <b>Item No</b> | <b>Recommendation</b>                                                                                                                                                                                             | <b>Manuscript Mapping</b>                                                                                                                         |
|---------------------------|----------------|-------------------------------------------------------------------------------------------------------------------------------------------------------------------------------------------------------------------|---------------------------------------------------------------------------------------------------------------------------------------------------|
| <b>Title and abstract</b> | 1              | (a) Indicate the study’s design with a commonly used term in the title or the abstract<br>(b) Provide in the abstract an informative and balanced summary of what was done and what was found                     | “Real-world evidence of clinical outcomes of the long-term use”<br>Provided.                                                                      |
| <b>Introduction</b>       |                |                                                                                                                                                                                                                   |                                                                                                                                                   |
| Background/rationale      | 2              | Explain the scientific background and rationale for the investigation being reported                                                                                                                              | Done – 1. Introduction                                                                                                                            |
| Objectives                | 3              | State specific objectives, including any prespecified hypotheses                                                                                                                                                  | Done – 1. Introduction (Final paragraph)<br>Expanded upon in 2.1. Study Design                                                                    |
| <b>Methods</b>            |                |                                                                                                                                                                                                                   |                                                                                                                                                   |
| Study design              | 4              | Present key elements of study design early in the paper                                                                                                                                                           | Done – 2.1. Study Design                                                                                                                          |
| Setting                   | 5              | Describe the setting, locations, and relevant dates, including periods of recruitment, exposure, follow-up, and data collection                                                                                   | Done – 2.1. Study Design<br>2.2. Data Collection                                                                                                  |
| Participants              | 6              | (a) Give the eligibility criteria, and the sources and methods of selection of participants. Describe methods of follow-up<br>(b) For matched studies, give matching criteria and number of exposed and unexposed | Done – 2.1. Study Design<br>2.2. Data Collection<br>Done for SNDS Matching – 2.2.2. SB5 Treatment Persistence                                     |
| Variables                 | 7              | Clearly define all outcomes, exposures, predictors, potential confounders, and effect modifiers. Give diagnostic criteria, if applicable                                                                          | Done – 2.2. Data Collection                                                                                                                       |
| Data sources/measurement  | 8*             | For each variable of interest, give sources of data and details of methods of assessment (measurement). Describe comparability of assessment methods if there is more than one group                              | Done – 2.2. Data Collection                                                                                                                       |
| Bias                      | 9              | Describe any efforts to address potential sources of bias                                                                                                                                                         | Done – 2.3. Statistical Analysis                                                                                                                  |
| Study size                | 10             | Explain how the study size was arrived at                                                                                                                                                                         | Done – 2.3. Statistical Analysis<br>This is an observational study, and the sample was also limited by recruitment capacity and time constraints. |
| Quantitative variables    | 11             | Explain how quantitative variables were handled in the analyses. If applicable, describe which groupings were chosen and why                                                                                      | Done – 2.3. Statistical Analysis                                                                                                                  |
| Statistical methods       | 12             | (a) Describe all statistical methods, including those used to control for confounding<br>(b) Describe any methods used to examine                                                                                 | Done – 2.3. Statistical Analysis<br>Done – 2.3. Statistical Analysis                                                                              |

subgroups and interactions

(c) Explain how missing data were addressed Done – 2.3. Statistical Analysis

(d) If applicable, explain how loss to follow-up was addressed Done – 2.3. Statistical Analysis

(e) Describe any sensitivity analyses Done – 2.3. Statistical Analysis

## Results

|                  |     |                                                                                                                                                                                                              |                                                                                                         |
|------------------|-----|--------------------------------------------------------------------------------------------------------------------------------------------------------------------------------------------------------------|---------------------------------------------------------------------------------------------------------|
| Participants     | 13* | (a) Report numbers of individuals at each stage of study—eg numbers potentially eligible, examined for eligibility, confirmed eligible, included in the study, completing follow-up, and analysed            | Done – 3.1. and Fig. 1                                                                                  |
|                  |     | (b) Give reasons for non-participation at each stage                                                                                                                                                         | Done – 3.1. and Fig. 1                                                                                  |
|                  |     | (c) Consider use of a flow diagram                                                                                                                                                                           | Done – Fig. 1                                                                                           |
| Descriptive data | 14* | (a) Give characteristics of study participants (eg demographic, clinical, social) and information on exposures and potential confounders                                                                     | Done – 3.1. and Tables 1 & 2                                                                            |
|                  |     | (b) Indicate number of participants with missing data for each variable of interest                                                                                                                          | Done – Data Density is reported for each analysis performed                                             |
|                  |     | (c) Summarise follow-up time (eg, average and total amount)                                                                                                                                                  | Done – Persistence Analysis presented in 3.3.                                                           |
| Outcome data     | 15* | Report numbers of outcome events or summary measures over time                                                                                                                                               | Done – Persistence Analysis presented in 3.3.                                                           |
| Main results     | 16  | (a) Give unadjusted estimates and, if applicable, confounder-adjusted estimates and their precision (eg, 95% confidence interval). Make clear which confounders were adjusted for and why they were included | Done – All results are reported as appropriate for type and density of data.                            |
|                  |     | (b) Report category boundaries when continuous variables were categorized                                                                                                                                    | Done – All results are reported as appropriate for type and density of data.                            |
|                  |     | (c) If relevant, consider translating estimates of relative risk into absolute risk for a meaningful time period                                                                                             | Multivariate Analysis presents odds ratios as is appropriate for this type of data.                     |
| Other analyses   | 17  | Report other analyses done—eg analyses of subgroups and interactions, and sensitivity analyses                                                                                                               | Done – All results are reported as appropriate for type and density of data for subgroup analyses also. |

## Discussion

|                |    |                                                                                                                                                            |                                                                                                            |
|----------------|----|------------------------------------------------------------------------------------------------------------------------------------------------------------|------------------------------------------------------------------------------------------------------------|
| Key results    | 18 | Summarise key results with reference to study objectives                                                                                                   | Done – Key results are summarised in the opening paragraph.                                                |
| Limitations    | 19 | Discuss limitations of the study, taking into account sources of potential bias or imprecision. Discuss both direction and magnitude of any potential bias | Done – Both methodological and data-related limitations are discussed with regard to available literature. |
| Interpretation | 20 | Give a cautious overall interpretation of results considering objectives, limitations, multiplicity of analyses, results from similar studies, and         | Done – Results are discussed with regard to available literature.                                          |

| other relevant evidence  |    |                                                                                                                                                               |                                                                   |
|--------------------------|----|---------------------------------------------------------------------------------------------------------------------------------------------------------------|-------------------------------------------------------------------|
| Generalisability         | 21 | Discuss the generalisability (external validity) of the study results                                                                                         | Done – Results are discussed with regard to available literature. |
| <b>Other information</b> |    |                                                                                                                                                               |                                                                   |
| Funding                  | 22 | Give the source of funding and the role of the funders for the present study and, if applicable, for the original study on which the present article is based | Done – Declarations Section completed.                            |

\*Give information separately for exposed and unexposed groups.

**Note:** An Explanation and Elaboration article discusses each checklist item and gives methodological background and published examples of transparent reporting. The STROBE checklist is best used in conjunction with this article (freely available on the Web sites of PLoS Medicine at <http://www.plosmedicine.org/>, Annals of Internal Medicine at <http://www.annals.org/>, and Epidemiology at <http://www.epidem.com/>). Information on the STROBE Initiative is available at <http://www.strobe-statement.org>.
